# Supplementary material for: Advancing understanding of Ficus carica: a comprehensive genomic analysis reveals evolutionary patterns and metabolic pathway insights
Source: Front Plant Sci. 2023 Dec 7;14:1298417. doi: 10.3389/fpls.2023.1298417 (PMC10754049; doi:10.3389/fpls.2023.1298417)
Supplement: Supplementary file 15 [file Table_1.xlsx]

## Sheet: Sheet1
Supplemental Table 1. Overview of Sequencing Data in F. carica
Nanopore	Cleaned data (Gb)	Cleaned reads number	Mean Length(bp)	Max Length (bp)	N50 Length (bp)	Sequencing depth (×)	Function
	42	3301024	12776.1	476214	19362	100	Assembly
Hi-C	Raw data (Gb)	Raw reads number	Cleaned data (Gb)	Cleaned reads number	%≥Q30	Sequencing depth (×)	Function
	64.265	429339016	61.66	421080064	90.8	140	Assembly
NovaSeq6000	Raw data (Gb)	Cleaned data (Gb)	%≥Q30	Sequencing depth (×)	Function
	25.71	25.63	91.69	75	Survey
Note: Assuming the genome size of Ficus carica is 356 Mb.
