# Supplementary material for: Advancing understanding of Ficus carica: a comprehensive genomic analysis reveals evolutionary patterns and metabolic pathway insights
Source: Front Plant Sci. 2023 Dec 7;14:1298417. doi: 10.3389/fpls.2023.1298417 (PMC10754049; doi:10.3389/fpls.2023.1298417)
Supplement: Supplementary file 16 [file Table_2.xlsx]

## Sheet: Sheet1
Supplemental Table 2. Overview of Genome Assembly of F. carica and Gene Prediction
Assembly Feature	Nanopore reads	Hi-C
	Assembly
genome size (bp)	373718651	366336389
N50 contig (bp)	9781938
N90 contig (bp)	126397
Max. contig (bp)	22062110
Chromosome		13
Max. chrosome (bp)		42364907
GC content		0.3413
Assembly Annotation	Number	Length(Mb)
Total repetitive sequence	812147	175.63
Genes	29783	373.71
Genes in a chromosome	29039	366.33
