# Supplementary material for: Advancing understanding of Ficus carica: a comprehensive genomic analysis reveals evolutionary patterns and metabolic pathway insights
Source: Front Plant Sci. 2023 Dec 7;14:1298417. doi: 10.3389/fpls.2023.1298417 (PMC10754049; doi:10.3389/fpls.2023.1298417)
Supplement: Supplementary file 17 [file Table_3.xlsx]

## Sheet: Sheet1
Supplemental Table 3. Overview of Genome Assembly of Hi-C
Hi-C data mapping	Orphan	Evaluate Paired-end Reads	Orphan
Clean Paired-end Reads (bp)	210540032	Unique Mapped Paired-end Reads (bp)	105760934
Unmapped Paired-end Reads (bp)	13073106	Dangling End Paired-end Reads (bp)	5404549
Unmapped Paired-end Reads Rate (%)	6.21	Self Circle Paired-end Reads (bp)	732470
Paired-end Reads with Singleton (bp)	36863653	Dumped Paired-end Reads (bp)	13534892
Paired-end Reads with Singleton Rate (%)	17.51	Valid Paired-end Reads (bp)	85389173
Multi Mapped Paired-end Reads (bp)	54842339	Valid Rate (%)	80.74
Multi Mapped Ratio (%)	26.05	Vailded reads of unique mapping(%)	40.56
