# Supplementary material for: Advancing understanding of Ficus carica: a comprehensive genomic analysis reveals evolutionary patterns and metabolic pathway insights
Source: Front Plant Sci. 2023 Dec 7;14:1298417. doi: 10.3389/fpls.2023.1298417 (PMC10754049; doi:10.3389/fpls.2023.1298417)
Supplement: Supplementary file 18 [file Table_4.xlsx]

## Sheet: Sheet1
Supplemental Table 4. Evaluation of Completeness of the Final Genome Assembly using Benchmarking Universal Single-Copy Orthologs (BUSCO)
Type	Percent(%)
Complete BUSCOs (C)	96.2
Complete and single-copy BUSCOs (S)	90.6
Complete and duplicated BUSCOs (D)	5.6
Fragmented BUSCOs (F)	0.9
Missing BUSCOs (M)	2.9
Total BUSCO groups searched	100
