# Supplementary material for: Advancing understanding of Ficus carica: a comprehensive genomic analysis reveals evolutionary patterns and metabolic pathway insights
Source: Front Plant Sci. 2023 Dec 7;14:1298417. doi: 10.3389/fpls.2023.1298417 (PMC10754049; doi:10.3389/fpls.2023.1298417)
Supplement: Supplementary file 19 [file Table_5.xlsx]

## Sheet: Sheet1
Supplemental Table 5. Overview of Assembly Anchoring on the 13 Pseudo-molecules of F. carica Genome.
Chr	Size	Contig Number	Gene_Number	Gene Length(bp)	TE Number	TE Length(bp)
Chr1	28617688	98	2401	8008212	62788	14181446
Chr2	37744962	66	3457	10827362	83153	17366204
Chr3	46621872	63	2419	6267961	101538	32110103
Chr4	27095387	63	2449	7757920	59266	12655119
Chr5	25435897	45	2497	8423439	56799	10453118
Chr6	23448488	41	1893	6125236	49864	12606265
Chr7	25983657	41	2170	6674356	60803	13157089
Chr8	24095815	31	1828	5814677	53674	12762907
Chr9	24883507	46	1992	5962100	55387	13225565
Chr10	21530364	45	1746	5796742	49090	10229956
Chr11	21741777	36	2095	6618602	48732	9966291
Chr12	25024500	36	2220	7601426	56465	10567356
Chr13	29589715	42	1872	5256665	62576	19092882
Total	366336389	653	29039	91134698	800135	188374301
