# Supplementary material for: Advancing understanding of Ficus carica: a comprehensive genomic analysis reveals evolutionary patterns and metabolic pathway insights
Source: Front Plant Sci. 2023 Dec 7;14:1298417. doi: 10.3389/fpls.2023.1298417 (PMC10754049; doi:10.3389/fpls.2023.1298417)
Supplement: Supplementary file 20 [file Table_6.xlsx]

## Sheet: Sheet1
Supplemental Table 6. Statistics of Repeat Contents in the Assembled F. carica Genome.
Type	Number	Length (bp)	percentage of sequence
Retroelements	31410	38725510	0.1049
LINEs	4431	1399295	0.0038
L1/CIN4	4431	1399295	0.0038
LTR elements	26979	37326215	0.1011
Ty1/Copia	8249	8249	0.025
Gypsy/DIRS1	18406	27747720	0.0752
DNA transposons	17707	12024909	0.0326
hobo-Activator	1582	776537	0.0021
Tourist/Harbinger	3348	1637377	0.0044
Rolling-circles	2078	1808344	0.0049
Unclassified	395802	112131312	0.3038
Simple repeats	274788	9884689	0.0268
Low complexity	45190	2309788	0.0063
Total interspersed repeats: 162881731 bp 44.13 %
