# Supplementary material for: Advancing understanding of Ficus carica: a comprehensive genomic analysis reveals evolutionary patterns and metabolic pathway insights
Source: Front Plant Sci. 2023 Dec 7;14:1298417. doi: 10.3389/fpls.2023.1298417 (PMC10754049; doi:10.3389/fpls.2023.1298417)
Supplement: Supplementary file 21 [file Table_7.xlsx]

## Sheet: Sheet1
Supplementary Table 7. Statistics of Samples Used for RNA-Seq Sequencing and Metabonomics
Sample	Reads Length	organization	Description	Raw Reads	Clean Reads	Clean Base(Gb)	Error Rate(%)	Q30(%)	GC Content(%)	mapped rate(%)
F1-1	150_150	fruit	Orphan	54601344	53067042	7.96	0.03	90.92	46.64	0.944
F1-2	150_150	fruit	Orphan	51738130	49990236	7.5	0.03	91.84	46.62	0.9472
F1-3	150_150	fruit	Orphan	52289536	50607370	7.59	0.03	91.19	46.76	0.9437
F2-1	150_150	fruit	Balaonai	52245166	50281406	7.54	0.03	91.53	46.65	0.9465
F2-2	150_150	fruit	Balaonai	63777140	61225952	9.18	0.03	91.58	46.52	0.9401
F2-3	150_150	fruit	Balaonai	60877644	58469174	8.77	0.03	91.36	46.5	0.941
F3-1	150_150	fruit	Violette Solise	55265108	51810484	7.77	0.03	90.83	45.72	0.9335
F3-2	150_150	fruit	Violette Solise	51201904	49375226	7.41	0.03	91.12	46.67	0.9413
F3-3	150_150	fruit	Violette Solise	45989434	43638472	6.55	0.03	91.02	46.51	0.9387
F4-1	150_150	fruit	Bpjihon	47892934	46475844	6.97	0.03	91.53	46.56	0.9434
F4-2	150_150	fruit	Bpjihon	49952946	48477476	7.27	0.03	90.34	46.79	0.9408
F4-3	150_150	fruit	Bpjihon	46386630	44041342	6.61	0.03	91.23	46.56	0.9433
