# Supplementary material for: Advancing understanding of Ficus carica: a comprehensive genomic analysis reveals evolutionary patterns and metabolic pathway insights
Source: Front Plant Sci. 2023 Dec 7;14:1298417. doi: 10.3389/fpls.2023.1298417 (PMC10754049; doi:10.3389/fpls.2023.1298417)
Supplement: Supplementary file 22 [file Table_8.xlsx]

## Sheet: Sheet1
Supplementary Table 8. Transcription Factors and Protein Kinases Identified in Passiflora edulis
Transcription Factors	Number	Transcription Factors	Number	Transcription Factors	Number	Transcription Factors	Number	Transcription Factors	Number
Alfin-like	0	AP2/ERF-ERF	83	AP2/ERF-RAV	1	AP2/ERF-AP2	7	B3	31
B3-ARF	26	BBR-BPC	6	BES1	5	bHLH	115	BSD	1
bZIP	61	C2C2-YABBY	8	C2C2-CO-like	10	C2C2-GATA	22	C2C2-LSD	6
C2C2-Dof	16	C2H2	76	C3H	54	CAMTA	4	CPP	7
CSD	3	DBB	5	DBP	4	DDT	5	E2F-DP	4
EIL	1	FAR1	12	GARP-ARR-B	9	GARP-G2-like	40	GRAS	29
GRF	12	HB-other	13	HB-HD-ZIP	37	HB-KNOX	9	HB-PHD	2
HB-BELL	12	HB-WOX	6	HRT	2	HSF	18	LFY	2
LIM	7	LOB	33	MADS-MIKC	28	MADS-M-type	24	MYB	110
MYB-related	46	NAC	26	NF-YC	5	NF-YB	8	NF-YA	14
NF-X1	1	OFP	10	PLATZ	17	RWP-RK	10	S1Fa-like	3
SBP	14	SRS	6	TCP	10	Tify	14	Trihelix	18
TUB	9	VOZ	1	Whirly	3	WRKY	57	zf-HD	6
ARID	14	AUX/IAA	26	Coactivator p15	1	GNAT	26	HMG	11
IWS1	6	Jumonji	14	LUG	4	MBF1	2	MED6	1
MED7	1	mTERF	25	Others	58	PHD	28	Pseudo ARR-B	4
RB	3	Rcd1-like	1	SET	34	SNF2	27	SWI/SNF-BAF60b	18
SWI/SNF-SWI3	3	TAZ	6	TRAF	16
Protein Kinases	Number	Protein Kinases	Number	Protein Kinases	Number	Protein Kinases	Number	Protein Kinases	Number
AGC_MAST	3	CMGC_DYRK-YAK	1	RLK-Pelle_LRR-Xb-2	1	RLK-Pelle_LRR-II	13	RLK-Pelle_RKF3	3
AGC_RSK-2	15	CMGC_CDK-CCRK	1	RLK-Pelle_LRR-IV	5	RLK-Pelle_SD-2b	10	RLK-Pelle_RLCK-IXa	4
AGC_NDR	8	CMGC_Pl-Tthe	1	RLK-Pelle_LRR-VI-1	9	RLK-Pelle_RLCK-VIIb	2	RLK-Pelle_RLCK-XII-2	1
AGC_PKA-PKG	1	CMGC_DYRK-PRP4	1	RLK-Pelle_LRR-XI-2	2	RLK-Pelle_PERK-1	14	RLK-Pelle_Singleton	3
CAMK_CDPK	39	NAK	4	RLK-Pelle_DLSV	16	RLK-Pelle_LRR-VII-1	3	RLK-Pelle_RLCK-XV	2
CAMK_CAMKL-CHK1	22	AGC-Pl	1	RLK-Pelle_LRR-V	9	RLK-Pelle_RLCK-V	13	STE_STE11	26
CAMK_OST1L	10	WNK_NRBP	13	RLK-Pelle_L-LEC	4	RLK-Pelle_RLCK-IV	3	STE_STE-Pl	2
CAMK_AMPK	2	NEK	3	RLK-Pelle_LRR-VIII-1	6	RLK-Pelle_LysM	4	STE_STE20-Fray	3
CAMK_CAMKL-LKB	1	IRE1	1	RLK-Pelle_LRR-IX	8	RLK-Pelle_LRR-XIV	2	STE_STE20-YSK	1
CK1_CK1	12	PEK_PEK	1	RLK-Pelle_CR4L	5	RLK-Pelle_PERK-2	4	STE_STE20-Pl	1
CK1_CK1-Pl	3	TTK	1	RLK-Pelle_RLCK-VIIa-1	15	RLK-Pelle_LRR-VI-2	4	STE_STE7	3
CMGC_CDK-CDK7	3	SCY1_SCYL2	1	RLK-Pelle_RLCK-XII-1	9	RLK-Pelle_LRR-VII-2	2	TKL_CTR1-DRK-2	13
CMGC_MAPK	20	ULK_Fused	1	RLK-Pelle_LRR-I-1	9	RLK-Pelle_RLCK-XVI	2	TKL-Pl-4	26
CMGC_CDK-CRK7-CDK9	14	TLK	1	RLK-Pelle_RLCK-VIII	5	RLK-Pelle_URK-1	2	TKL-Pl-1	4
CMGC_CDK-PITSLRE	3	PEK_GCN2	1	RLK-Pelle_RLCK-II	1	RLK-Pelle_LRR-Xb-1	2	TKL_CTR1-DRK-1	1
CMGC_CLK	4	WEE	1	RLK-Pelle_LRR-XI-1	40	RLK-Pelle_CrRLK1L-1	4	TKL-Pl-5	7
CMGC_CDK-Pl	3	Aur	3	RLK-Pelle_LRK10L-2	19	RLK-Pelle_RLCK-XIII	1	TKL-Pl-6	6
CMGC_GSK	18	Group-Pl-4	2	RLK-Pelle_WAK	23	RLK-Pelle_LRR-I-2	3	TKL_Gdt	1
CMGC_CK2	4	Group-Pl-2	1	RLK-Pelle_LRR-XIIIb	2	RLK-Pelle_LRR-Xa	4	TKL-Pl-3	3
CMGC_SRPK	2	RLK-Pelle_WAK_LRK10L-1	10	RLK-Pelle_LRR-XII-1	16	RLK-Pelle_RLCK-X	4	TKL-Pl-2	1
CMGC_CDK-CDK8	3	RLK-Pelle_LRR-III	40	RLK-Pelle_Extensin	12	RLK-Pelle_C-LEC	1	TKL-Pl-7	1
CMGC_RCK	5	RLK-Pelle_LRR-XIIIa	3	RLK-Pelle_RLCK-VI	20	RLK-Pelle_LRR-XV	3	TKL-Pl-8	1
CMGC_GSKL	1	RLK-Pelle_RLCK-VIIa-2	27	RLK-Pelle_RLCK-IXb	9
